# Supplementary material for: Exosomal long non-coding RNA DLX6-AS1 as a potential diagnostic biomarker for non-small cell lung cancer
Source: PubMed Central journal article supplement — Oncol Lett. 2019 Sep 19;18(5):5197–204. doi: 10.3892/ol.2019.10892 (PMC6781719; doi:10.3892/ol.2019.10892), 2019-09-19

Figure S1. DLX6-AS1-knockdown suppresses cell proliferation and migration *in vitro*. (A) DLX6-AS1 expression was measured by reverse transcription-quantitative PCR in NSCLC cell lines. (B) DLX6-AS1 expression was detected by reverse transcription-quantitative PCR following transfection. (C) A549 cell proliferation was analyzed by RTCA assay following si-DLX6-AS1 plasmid transfection. (D) H1299 cell proliferation was analyzed using RTCA assay following transfection. (E) A549 cell migration was performed using RTCA assay following transfection. (F) H1299 cell migration was performed using RTCA assay following transfection. The data were analyzed using a Student's t-test. \* $P < 0.05$ ; \*\* $P < 0.01$ ; \*\*\* $P < 0.001$ . Ctrl, scrambled siRNA; DLX6-AS1, distal-less homeobox 6 antisense RNA 1; NSCLC, non-small cell lung cancer; RTCA, real-time cell analysis; si, small interfering RNA.

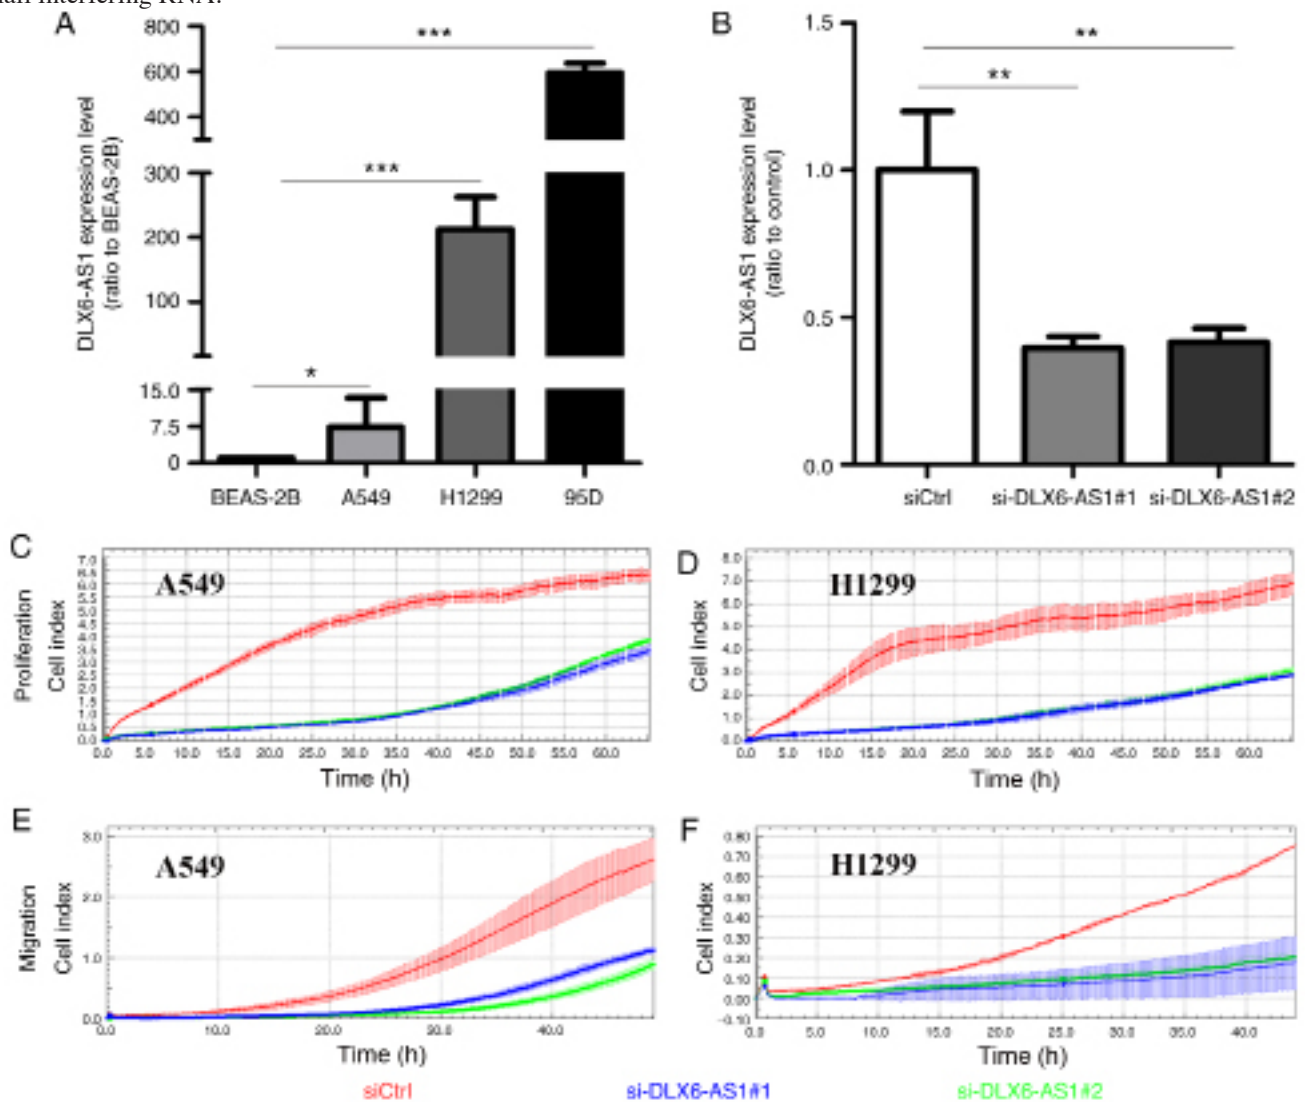

Supplement: Supplementary_Data.pdf [file Supplementary_Data.pdf]
